# Supplementary material for: Structure Analysis Uncovers a Highly Diverse but Structurally Conserved Effector Family in Phytopathogenic Fungi
Source: PLOS journal article supplement (doi:10.1371/journal.ppat.1005228), 2015-10-27
Supplement: S2 (10.1371/journal.ppat.1005228.s002) [file journal.ppat.1005228.s002]

**S2 Table.** DALI Statistics for structural alignment of AVR-Pia, AVR1-CO39, AVRPiz-t and ToxB.

| <b>RMSD<br/>(Å)</b> | AVR-Pia | AVR1-CO39 | AVRPiz-t | ToxB |
|---------------------|---------|-----------|----------|------|
| <b>Z-score</b>      |         |           |          |      |
| AVR-Pia             |         | 2.3       | 2.8      | 2.2  |
| AVR1-CO39           | 2.9     |           | 3.0      | 2.2  |
| AVRPiz-t            | 3.3     | 3.1       |          | 2.2  |
| ToxB                | 4.4     | 4.2       | 5.4      |      |

The rmsd (upper right) and the Z-score (lower left) are from the pairwise superposition. The low RMSDs and the high Z-scores indicate that the ToxB(b) structure is the closest to the other three structures.
